# Supplementary material for: Trends in Premature Mortality From Acute Myocardial Infarction in the United States, 1999 to 2019
Source: PubMed Central journal article supplement — J Am Heart Assoc. 2021 Dec 22;11(1):e021682. doi: 10.1161/JAHA.121.021682 (PMC9075205; doi:10.1161/jaha.121.021682), 2021-12-22
Supplement: JAH3-11-e021682-s001.pdf [file JAH3-11-e021682-s001.pdf]

# **Supplemental Material**

**Table S1. Trends in age-adjusted acute myocardial infarction mortality rates in the non-elderly adults in the United States, 1999-2019.**

|                      | Age-adjusted mortality rates (95% CI) |                  |                  | Average Annual Percent Change (95% CI) |                      |                      |
|----------------------|---------------------------------------|------------------|------------------|----------------------------------------|----------------------|----------------------|
|                      | 1999                                  | 2011             | 2019             | 1999-2011                              | 2011-2019            | 1999-2019            |
| <b>Entire US</b>     | 20.4 (20.2-20.7)                      | 12.0 (11.8-12.1) | 9.9 (9.8-10.0)   | -4.35 (-4.57, -4.13)                   | -2.09 (-2.38, -1.81) | -3.45 (-3.64, -3.27) |
| Alabama              | 31.5 (29.4-33.5)                      | 23.6 (22.0-25.2) | 13.4 (12.2-14.6) | -5.48 (-6.84, -4.10)                   | -7.44 (-8.17, -6.71) | -6.27 (-7.13, -5.40) |
| Alaska               | 11.7 (8.3-16.1)                       | 3.0 (2.1-5.9)    | 3.1 (2.2-6.2)    | -8.16 (-12.38, -3.74)                  | -1.59 (-3.76, 0.63)  | -5.59 (-8.50, -2.58) |
| Arizona              | 14.6 (13.3-16.0)                      | 6.3 (5.5-7.0)    | 5.6 (4.9-6.3)    | -7.10 (-8.99, -5.17)                   | -3.76 (-4.41, -3.11) | -5.78 (-6.98, -4.56) |
| Arkansas             | 40.7 (37.7-43.7)                      | 37.8 (35.2-40.4) | 40.6 (37.9-43.3) | -3.06 (-4.50, -1.59)                   | 0.05 (-1.18, 1.30)   | -1.82 (-2.85, -0.79) |
| California           | 14.0 (13.4-14.5)                      | 7.8 (7.4-8.1)    | 6.3 (6.0-6.6)    | -6.11 (-6.57, -5.64)                   | -3.74 (-4.50, -2.98) | -5.17 (-5.59, -4.75) |
| Colorado             | 13.8 (12.3-15.2)                      | 6.4 (5.6-7.2)    | 5.4 (4.7-6.1)    | -6.93 (-7.42, -6.44)                   | -3.13 (-4.40, -1.84) | -5.43 (-6.02, -4.83) |
| Connecticut          | 10.9 (9.6-12.3)                       | 5.5 (4.7-6.4)    | 5.2 (4.3-6.1)    | -6.19 (-6.79, -5.59)                   | -4.68 (-5.31, -4.05) | -5.59 (-6.06, -5.11) |
| Delaware             | 15.8 (12.5-19.7)                      | 8.7 (6.6-11.3)   | 4.9 (3.5-6.8)    | -7.86 (-11.74, -3.81)                  | -6.24 (-8.65, -3.77) | -7.22 (-9.85, -4.50) |
| District of Columbia | 9.3 (6.4-13.1)                        | 5.1 (3.2-7.8)    | 8.0 (5.5-11.2)   | -4.78 (-9.29, -0.04)                   | -3.35 (-5.83, -0.81) | -4.21 (-7.16, -1.17) |
| Florida              | 16.4 (15.6-17.1)                      | 8.9 (8.5-9.4)    | 7.3 (6.8-7.7)    | -6.42 (-7.39, -5.44)                   | -3.79 (-4.12, -3.46) | -5.38 (-5.99, -4.76) |
| Georgia              | 24.3 (22.9-25.6)                      | 12.8 (11.9-13.6) | 12.2 (11.4-13.0) | -6.20 (-7.58, -4.80)                   | -3.56 (-4.14, -2.97) | -5.15 (-6.02, -4.28) |
| Hawaii               | 7.9 (4.8-12.2)                        | 7.5 (5.0-10.8)   | 7.5 (5.0-10.8)   | -3.99 (-4.64, -3.33)                   | -3.99 (-4.64, -3.33) | -3.99 (-4.64, -3.33) |
| Idaho                | 27.1 (23.5-30.8)                      | 15.3 (13.0-17.7) | 14.4 (12.2-16.5) | -5.26 (-5.68, -4.83)                   | -3.14 (-6.57, 0.41)  | -4.42 (-5.81, -3.00) |
| Illinois             | 23.2 (22.1-24.3)                      | 12.4 (11.7-13.2) | 10.4 (9.7-11.1)  | -6.50 (-6.79, -6.21)                   | -3.63 (-4.10, -3.15) | -5.36 (-5.62, -5.10) |
| Indiana              | 25.7 (24.1-27.3)                      | 18.2 (17.0-19.4) | 14.6 (13.5-15.7) | -5.51 (-6.08, -4.93)                   | -3.40 (-5.68, -1.07) | -4.67 (-5.68, -3.65) |
| Iowa                 | 20.4 (18.3-22.4)                      | 11.4 (10.0-12.7) | 10.1 (8.8-11.4)  | -5.11 (-5.43, -4.80)                   | -5.11 (-5.43, -4.80) | -5.11 (-5.43, -4.80) |
| Kansas               | 19.1 (17.9-21.3)                      | 10.9 (9.5-12.4)  | 8.7 (7.4-10.0)   | -6.65 (-7.42, -5.86)                   | -2.50 (-4.13, -0.85) | -5.01 (-5.88, -4.14) |
| Kentucky             | 37.6 (35.3-39.9)                      | 27.4 (25.6-29.2) | 26.3 (24.6-28.1) | -4.88 (-5.31, -4.44)                   | -2.22 (-3.33, -1.09) | -3.82 (-4.34, -3.29) |
| Louisiana            | 32.1 (30.0-34.3)                      | 20.1 (18.5-21.6) | 14.8 (13.5-16.2) | -6.00 (-7.50, -4.47)                   | -4.99 (-6.31, -3.65) | -5.60 (-6.62, -4.56) |
| Maine                | 16.7 (14.0-19.3)                      | 9.3 (7.5-11.0)   | 6.4 (5.0-8.0)    | -5.79 (-6.78, -4.79)                   | -3.62 (-4.67, -2.56) | -4.93 (-5.71, -4.14) |
| Maryland             | 16.3 (14.9-17.6)                      | 9.5 (8.6-10.4)   | 7.8 (7.0-8.6)    | -6.80 (-7.14, -6.46)                   | -4.88 (-6.22, -3.52) | -6.04 (-6.62, -5.45) |
| Massachusetts        | 15.0 (13.8-16.3)                      | 6.1 (5.4-6.7)    | 4.7 (4.1-5.3)    | -6.47 (-8.79, -4.09)                   | -5.33 (-5.83, -4.82) | -6.01 (-7.45, -4.56) |
| Michigan             | 20.4 (19.3-21.6)                      | 10.5 (9.8-11.3)  | 8.5 (7.9-9.2)    | -6.55 (-7.01, -6.10)                   | -3.80 (-4.39, -3.21) | -5.46 (-5.84, -5.08) |
| Minnesota            | 13.3 (12.0-14.6)                      | 5.0 (4.3-5.7)    | 4.9 (4.2-5.6)    | -7.85 (-8.59, -7.10)                   | -2.92 (-4.84, -0.96) | -5.91 (-6.84, -4.97) |
| Mississippi          | 42.2 (39.2-45.3)                      | 32.2 (29.8-34.6) | 36.3 (33.7-38.9) | -4.67 (-5.49, -3.84)                   | 0.88 (-1.96, 3.80)   | -2.49 (-3.75, -1.21) |
| Missouri             | 31.5 (29.7-33.4)                      | 23.9 (22.5-25.3) | 18.6 (17.3-19.8) | -4.70 (-5.25, -4.14)                   | -3.40 (-3.72, -3.07) | -4.18 (-4.56, -3.80) |
| Montana              | 13.2 (10.5-16.5)                      | 8.0 (6.2-10.3)   | 5.5 (3.9-7.6)    | -8.00 (-9.18, -6.81)                   | -2.46 (-6.25, 1.48)  | -5.82 (-7.51, -4.11) |
| Nebraska             | 14.2 (11.9-16.5)                      | 10.1 (8.3-11.8)  | 10.3 (8.6-12.1)  | -5.58 (-6.35, -4.80)                   | -0.34 (-1.37, 0.71)  | -3.51 (-4.17, -2.85) |
| Nevada               | 14.4 (12.3-16.5)                      | 6.5 (5.4-7.7)    | 5.7 (4.6-6.7)    | -7.70 (-8.64, -6.76)                   | -1.77 (-3.81, 0.32)  | -5.37 (-6.35, -4.39) |
| New Hampshire        | 14.4 (11.8-17.0)                      | 6.0 (4.7-7.7)    | 3.9 (2.9-5.2)    | -6.78 (-7.91, -5.64)                   | -4.58 (-5.38, -3.76) | -5.91 (-6.72, -5.09) |
| New Jersey           | 17.3 (16.2-18.4)                      | 8.8 (8.0-9.5)    | 6.7 (6.1-7.4)    | -6.64 (-7.26, -6.01)                   | -4.23 (-4.64, -3.81) | -5.68 (-6.11, -5.25) |
| New Mexico           | 9.5 (7.7-11.4)                        | 5.5 (4.4-6.9)    | 7.7 (6.2-9.2)    | -4.15 (-4.94, -3.36)                   | 3.48 (0.25, 6.81)    | -1.17 (-2.54, 0.22)  |
| New York             | 15.9 (15.1-16.6)                      | 8.0 (7.6-8.5)    | 6.4 (6.0-6.9)    | -5.80 (-6.61, -4.99)                   | -5.00 (-5.81, -4.19) | -5.48 (-6.14, -4.82) |
| North Carolina       | 21.4 (20.1-22.6)                      | 11.7 (10.9-12.5) | 9.3 (8.6-9.9)    | -5.95 (-6.43, -5.48)                   | -4.17 (-4.51, -3.84) | -5.25 (-5.59, -4.91) |

|                       |                    |                    |                    |                      |                      |                      |
|-----------------------|--------------------|--------------------|--------------------|----------------------|----------------------|----------------------|
| North Dakota          | 23.2 (18.6-28.5)   | 8.7 (6.2-11.8)     | 7.7 (5.4-10.5)     | -6.77 (-7.34, -6.20) | -3.38 (-6.29, -0.39) | -5.43 (-6.66, -4.19) |
| Ohio                  | 22.5 (21.4-23.5)   | 13.9 (13.2-14.7)   | 11.5 (10.8-12.2)   | -5.82 (-6.27, -5.37) | -3.18 (-3.76, -2.59) | -4.77 (-5.15, -4.40) |
| Oklahoma              | 22.0 (19.9-24.0)   | 9.0 (7.8-10.1)     | 7.8 (6.7-8.9)      | -7.01 (-7.73, -6.29) | -5.54 (-6.69, -4.37) | -6.43 (-7.07, -5.78) |
| Oregon                | 13.1 (11.6-14.6)   | 6.2 (5.2-7.1)      | 5.7 (4.9-6.6)      | -6.08 (-7.26, -4.89) | -2.65 (-3.66, -1.63) | -4.72 (-5.56, -3.88) |
| Pennsylvania          | 23.4 (22.4-24.5)   | 11.9 (11.2-12.6)   | 10.5 (9.8-11.1)    | -6.41 (-6.65, -6.18) | -3.47 (-3.92, -3.03) | -5.25 (-5.46, -5.04) |
| Rhode Island          | 19.3 (15.9-22.7)   | 10.5 (8.4-13.0)    | 7.5 (5.7-9.8)      | -5.88 (-7.40, -4.34) | -5.90 (-7.74, -4.02) | -5.89 (-7.12, -4.65) |
| South Carolina        | 35.1 (32.8-37.3)   | 19.3 (17.8-20.7)   | 13.8 (12.6-15.0)   | -6.45 (-7.20, -5.68) | -5.43 (-6.52, -4.33) | -6.04 (-6.79, -5.29) |
| South Dakota          | 27.4 (22.5-32.4)   | 19.0 (15.3-22.6)   | 22.5 (18.6-26.5)   | -3.68 (-4.63, -2.73) | -0.61 (-1.62, 0.40)  | -2.47 (-3.22, -1.71) |
| Tennessee             | 30.9 (29.1-32.7)   | 21.6 (20.3-22.9)   | 16.8 (15.7-18.0)   | -4.47 (-6.00, -2.90) | -3.81 (-4.37, -3.25) | -4.20 (-5.17, -3.23) |
| Texas                 | 23.0 (22.2-23.9)   | 14.2 (13.7-14.8)   | 11.5 (11.1-12.0)   | -6.47 (-7.07, -5.87) | -2.85 (-3.99, -1.69) | -5.04 (-5.57, -4.50) |
| Utah                  | 9.4 (7.6-11.4)     | 7.4 (6.1-8.8)      | 4.7 (3.7-5.7)      | -6.13 (-7.28, -4.97) | -3.63 (-4.63, -2.62) | -5.14 (-6.00, -4.27) |
| Vermont               | 15.2 (11.7-19.4)   | 6.9 (4.8-9.6)      | 3.6 (2.1-5.7)      | -6.44 (-7.03, -5.85) | -6.44 (-7.03, -5.85) | -6.44 (-7.03, -5.85) |
| Virginia              | 17.9 (16.7-19.1)   | 11.1 (10.2-11.9)   | 8.6 (7.8-9.3)      | -5.63 (-6.00, -5.25) | -3.80 (-4.29, -3.31) | -4.90 (-5.22, -4.58) |
| Washington            | 12.6 (11.4-13.7)   | 8.2 (7.4-9.0)      | 6.5 (5.8-7.2)      | -4.50 (-4.78, -4.21) | -4.50 (-4.78, -4.21) | -4.50 (-4.78, -4.21) |
| West Virginia         | 28.5 (25.6-31.4)   | 15.7 (13.7-17.7)   | 13.7 (11.7-15.6)   | -5.91 (-6.63, -5.18) | -3.81 (-4.44, -3.19) | -5.08 (-5.62, -4.53) |
| Wisconsin             | 21.4 (19.8-22.9)   | 12.2 (11.2-13.2)   | 9.7 (8.7-10.6)     | -6.12 (-6.72, -5.52) | -4.07 (-4.59, -3.55) | -5.31 (-5.75, -4.86) |
| Wyoming               | 16.6 (12.4-21.6)   | 18.4 (14.6-22.9)   | 11.6 (8.4-15.7)    | -2.68 (-3.23, -2.12) | -2.68 (-3.23, -2.12) | -2.68 (-3.23, -2.12) |
| <b>Age, years</b>     |                    |                    |                    |                      |                      |                      |
| <45                   | 3.2 (3.1-3.3)      | 2.3 (2.2-2.4)      | 1.8 (1.7-1.9)      | -2.79 (-3.07, -2.50) | -2.79 (-3.07, -2.50) | -2.79 (-3.07, -2.50) |
| 45-64                 | 54.4 (53.8 - 55.0) | 30.9 (30.5 - 31.3) | 25.8 (25.5 - 26.1) | -3.61 (-4.00, -3.23) | -4.62 (-5.21, -4.02) | -2.09 (-2.42, -1.75) |
| <b>Sex</b>            |                    |                    |                    |                      |                      |                      |
| Women                 | 10.8 (10.6 - 11.1) | 6.4 (6.2 - 6.5)    | 5.4 (5.3 - 5.6)    | -4.29 (-4.67, -3.91) | -1.93 (-2.34, -1.53) | -3.35 (-3.66, -3.05) |
| Men                   | 30.6 (30.2 - 31.0) | 17.7 (17.5 - 18.0) | 14.5 (14.3 - 14.8) | -4.41 (-4.59, -4.23) | -2.25 (-2.49, -2.02) | -3.55 (-3.71, -3.40) |
| <b>Ethnicity/race</b> |                    |                    |                    |                      |                      |                      |
| NH White adults       | 20.2 (20.0-20.5)   | 12.3 (12.1-12.5)   | 10.2 (10.1-10.4)   | -4.01 (-4.29, -3.72) | -2.18 (-2.43, -1.94) | -3.28 (-3.49, -3.07) |
| NH Black adults       | 27.9 (27.2-28.7)   | 15.2 (14.8-15.7)   | 12.9 (12.5-13.3)   | -5.41 (-5.75, -5.06) | -1.69 (-2.35, -1.03) | -3.94 (-4.25, -3.63) |
| Hispanic adults       | 12.1 (11.5-12.7)   | 6.5 (6.2-6.8)      | 5.8 (5.6-6.1)      | -4.73 (-5.34, -4.11) | -1.74 (-2.55, -0.93) | -3.54 (-4.06, -3.02) |
| <b>Urbanicity</b>     |                    |                    |                    |                      |                      |                      |
| Large metro           | 16.2 (16.0-16.5)   | 8.3 (8.1-8.4)      | 6.8 (6.6-6.9)      | -5.43 (-5.64, -5.22) | -2.32 (-2.66, -1.97) | -4.20 (-4.39, -4.00) |
| Medium/small metro    | 21.8 (21.4-22.2)   | 13.3 (13.0-13.5)   | 11.1 (10.9-11.4)   | -3.97 (-4.21, -3.72) | -2.25 (-2.47, -2.04) | -3.28 (-3.47, -3.10) |
| -Rural                | 30.8 (30.2-31.4)   | 21.8 (21.3-22.3)   | 19.0 (18.6-19.5)   | -3.05 (-3.39, -2.72) | -1.42 (-2.29, -0.53) | -2.40 (-2.85, -1.95) |

AAPC: Average Annual Percentage Change; CI: confidence interval; NH: Non-Hispanic

**Table S2. Age-adjusted acute myocardial infarction related mortality rates stratified by age in the non-elderly adults in the United States, 1999-2019.**

|                      | Age- adjusted mortality rate (95% CI) |                |                     |
|----------------------|---------------------------------------|----------------|---------------------|
|                      | Overall                               | 18-45 years    | 45-64 years         |
| <b>Entire US</b>     | 13.4 (13.3-13.5)                      | 2.5 (2.4-2.6)  | 34.9 (34.8-35.0)    |
| Alabama              | 22.9 (22.6-23.3)                      | 6.1 (5.8-6.4)  | 56.0 (55.1-56.9)    |
| Alaska               | 5.3 (4.8-5.8)                         | 1.2 (0.9-1.6)  | 13.3 (12.0-14.5)    |
| Arizona              | 7.8 (7.6-7.9)                         | 1.1 (1.0-1.2)  | 20.8 (20.3-21.3)    |
| Arkansas             | 41.2 (40.6-41.8)                      | 9.7 (9.3-10.1) | 103.1 (101.5-104.7) |
| California           | 8.7 (8.6-8.8)                         | 1.2 (1.1-1.3)  | 23.5 (23.3-23.8)    |
| Colorado             | 7.5 (7.3-7.7)                         | 1.3 (1.2-1.4)  | 19.7 (19.2-20.3)    |
| Connecticut          | 6.8 (6.6-7.0)                         | 1.1 (1.0-1.2)  | 18.0 (17.4-18.6)    |
| Delaware             | 9.4 (8.9-10.0)                        | 1.7 (1.3-2.0)  | 24.7 (23.3-26.1)    |
| District of Columbia | 9.4 (8.7-10.0)                        | 1.7 (1.4-2.1)  | 24.5 (22.7-26.3)    |
| Florida              | 10.3 (10.2-10.4)                      | 1.9 (1.8-2.0)  | 26.8 (26.5-27.1)    |
| Georgia              | 14.6 (14.4-14.8)                      | 2.7 (2.6-2.8)  | 38.0 (37.5-38.5)    |
| Hawaii               | 6.4 (5.8-7.0)                         | 1.0 (0.7-1.4)  | 17.0 (15.4-18.6)    |
| Idaho                | 18.6 (18.0-19.1)                      | 3.2 (2.9-3.5)  | 48.8 (47.2-50.3)    |
| Illinois             | 14.5 (14.3-14.6)                      | 2.5 (2.4-2.6)  | 38.0 (37.5-38.4)    |
| Indiana              | 19.0 (18.7-19.3)                      | 3.9 (3.7-4.1)  | 48.8 (48.1-49.5)    |
| Iowa                 | 13.6 (13.3-13.9)                      | 2.4 (2.2-2.6)  | 35.7 (34.8-36.6)    |
| Kansas               | 11.6 (11.3-12.0)                      | 1.9 (1.7-2.1)  | 30.8 (29.9-31.7)    |
| Kentucky             | 30.2 (29.8-30.6)                      | 6.8 (6.5-7.1)  | 76.2 (75.1-77.3)    |
| Louisiana            | 24.1 (23.7-24.5)                      | 5.4 (5.1-5.6)  | 60.9 (59.9-61.9)    |
| Maine                | 10.6 (10.2-11.0)                      | 1.8 (1.5-2.1)  | 27.8 (26.7-28.9)    |
| Maryland             | 10.6 (10.4-10.9)                      | 1.7 (1.6-1.9)  | 28.2 (27.6-28.8)    |
| Massachusetts        | 8.3 (8.1-8.5)                         | 1.2 (1.1-1.3)  | 22.2 (21.7-22.6)    |
| Michigan             | 12.1 (11.9-12.3)                      | 2.4 (2.2-2.5)  | 31.2 (30.8-31.7)    |
| Minnesota            | 6.7 (6.5-6.8)                         | 1.3 (1.2-1.4)  | 17.3 (16.8-17.8)    |
| Mississippi          | 33.2 (32.7-33.8)                      | 7.9 (7.5-8.3)  | 83.0 (81.6-84.5)    |
| Missouri             | 23.9 (23.6-24.2)                      | 5.0 (4.7-5.2)  | 61.2 (60.4-62.1)    |
| Montana              | 8.9 (8.4-9.4)                         | 1.8 (1.5-2.1)  | 22.9 (21.6-24.1)    |
| Nebraska             | 10.6 (10.2-11.0)                      | 2.1 (1.9-2.3)  | 27.4 (26.3-28.4)    |
| Nevada               | 8.4 (8.1-8.7)                         | 1.7 (1.5-1.9)  | 21.6 (20.8-22.5)    |
| New Hampshire        | 7.5 (7.2-7.9)                         | 1.5 (1.2-1.7)  | 19.5 (18.5-20.4)    |
| New Jersey           | 10.2 (10.0-10.3)                      | 1.6 (1.5-1.7)  | 27.0 (26.5-27.4)    |
| New Mexico           | 8.1 (7.8-8.4)                         | 1.4 (1.2-1.7)  | 21.2 (20.3-22.1)    |

|                       |                  |               |                  |
|-----------------------|------------------|---------------|------------------|
| New York              | 9.8 (9.7-9.9)    | 1.6 (1.5-1.7) | 25.8 (25.5-26.1) |
| North Carolina        | 12.8 (12.6-13.0) | 2.4 (2.3-2.5) | 33.3 (32.7-33.8) |
| North Dakota          | 12.1 (11.4-12.8) | 2.3 (1.8-2.7) | 31.4 (29.6-33.3) |
| Ohio                  | 15.2 (15.0-15.3) | 3.1 (3.0-3.2) | 38.8 (38.3-39.3) |
| Oklahoma              | 12.7 (12.4-13.0) | 2.6 (2.4-2.8) | 32.6 (31.8-33.5) |
| Oregon                | 7.7 (7.5-7.9)    | 1.1 (1.0-1.2) | 20.6 (20.0-21.2) |
| Pennsylvania          | 14.3 (14.2-14.5) | 2.6 (2.5-2.7) | 37.4 (36.9-37.8) |
| Rhode Island          | 12.0 (11.5-12.5) | 1.9 (1.6-2.2) | 31.9 (30.5-33.4) |
| South Carolina        | 20.8 (20.5-21.2) | 4.5 (4.2-4.7) | 53.1 (52.2-54.0) |
| South Dakota          | 20.0 (19.2-20.8) | 3.6 (3.1-4.1) | 52.3 (50.1-54.5) |
| Tennessee             | 23.6 (23.3-23.9) | 4.9 (4.7-5.1) | 60.6 (59.8-61.4) |
| Texas                 | 16.0 (15.9-16.1) | 2.7 (2.6-2.8) | 42.3 (41.9-42.6) |
| Utah                  | 7.1 (6.8-7.4)    | 1.0 (0.9-1.2) | 19.1 (18.3-20.0) |
| Vermont               | 6.9 (6.4-7.4)    | 1.3 (1.0-1.7) | 18.0 (16.7-19.3) |
| Virginia              | 12.2 (12.0-12.4) | 2.4 (2.3-2.5) | 31.5 (30.9-32.0) |
| Washington            | 8.9 (8.8-9.1)    | 1.3 (1.2-1.4) | 23.9 (23.4-24.4) |
| West Virginia         | 17.3 (16.8-17.7) | 3.8 (3.4-4.1) | 43.8 (42.6-45.1) |
| Wisconsin             | 13.7 (13.5-14.0) | 2.4 (2.2-2.5) | 36.1 (35.4-36.8) |
| Wyoming               | 17.6 (16.7-18.5) | 3.5 (2.9-4.1) | 45.4 (43.0-47.8) |
| <b>Sex</b>            |                  |               |                  |
| Women                 | 7.3 (7.2-7.4)    | 1.4 (1.3-1.5) | 18.8 (18.7-18.9) |
| Men                   | 20.0 (19.9-20.1) | 3.7 (3.6-3.8) | 52.0 (51.8-52.1) |
| <b>Ethnicity/race</b> |                  |               |                  |
| NH White adults       | 13.7 (13.6-13.8) | 2.7 (2.6-2.8) | 35.5 (35.4-35.7) |
| NH Black adults       | 17.5 (17.4-17.6) | 3.6 (3.5-3.7) | 44.8 (44.5-45.1) |
| Hispanic adults       | 7.6 (7.5-7.7)    | 1.1 (1.0-1.2) | 20.2 (20.0-20.4) |

CI: confidence interval; NH: Non-Hispanic

Rates were suppressed for data showing 0-9 deaths. Rates were not reported when estimates were unreliable for death counts less than 20.

**Table S3. Age-adjusted acute myocardial infarction related mortality rates stratified by sex and ethnicity/race in the non-elderly adults in the United States, 1999-2019.**

|                      | Age-adjusted mortality rate (95% CI) per 100,000 |                  |                  |                  |                  |
|----------------------|--------------------------------------------------|------------------|------------------|------------------|------------------|
|                      | Sex                                              |                  | Ethnicity/race   |                  |                  |
|                      | Women                                            | Men              | NH White adults  | NH Black adults  | Hispanic adults  |
| <b>Entire US</b>     | 7.3 (7.2-7.4)                                    | 20.0 (19.9-20.1) | 13.7 (13.6-13.8) | 17.5 (17.4-17.6) | 7.6 (7.5-7.7)    |
| Alabama              | 13.5 (13.1-13.8)                                 | 33.0 (32.4-33.6) | 23.1 (22.6-23.5) | 23.8 (23.1-24.5) | 6.4 (5.1-8.0)    |
| Alaska               | 2.2 (1.8-2.7)                                    | 8.0 (7.2-8.8)    | 5.4 (4.9-5.9)    | 6.6 (4.1-10.2)   | --               |
| Arizona              | 3.9 (3.7-4.1)                                    | 11.8 (11.5-12.1) | 8.2 (7.9-8.4)    | 9.6 (8.5-10.6)   | 6.2 (5.8-6.5)    |
| Arkansas             | 23.7 (23.0-24.3)                                 | 59.5 (58.4-60.5) | 40.5 (39.9-41.2) | 52.6 (50.7-54.4) | 10.5 (8.7-12.3)  |
| California           | 4.8 (4.7-4.9)                                    | 12.8 (12.7-12.9) | 9.3 (9.2-9.4)    | 14.0 (13.6-14.4) | 6.3 (6.2-6.5)    |
| Colorado             | 3.4 (3.2-3.6)                                    | 11.7 (11.3-12.0) | 7.2 (7.0-7.5)    | 9.5 (8.3-10.6)   | 8.9 (8.3-9.5)    |
| Connecticut          | 3.5 (3.3-3.7)                                    | 10.3 (10.0-10.7) | 6.7 (6.5-7.0)    | 8.8 (8.0-9.6)    | 5.8 (5.1-6.5)    |
| Delaware             | 5.3 (4.8-5.8)                                    | 14.0 (13.1-14.9) | 9.3 (8.8-9.9)    | 10.8 (9.6-12.1)  | 4.9 (3.2-7.1)    |
| District of Columbia | 6.4 (5.6-7.1)                                    | 12.7 (11.6-13.8) | 3.2 (2.5-3.9)    | 13.7 (12.7-14.7) | --               |
| Florida              | 5.5 (5.4-5.6)                                    | 15.4 (15.2-15.6) | 10.9 (10.8-11.1) | 13.2 (12.8-13.6) | 6.2 (6.0-6.4)    |
| Georgia              | 8.4 (8.2-8.6)                                    | 21.3 (20.9-21.6) | 14.9 (14.7-15.2) | 15.7 (15.3-16.1) | 3.7 (3.2-4.3)    |
| Hawaii               | 2.7 (2.2-3.3)                                    | 9.6 (8.7-10.6)   | 6.5 (5.8-7.1)    | --               | 6.2 (4.3-8.6)    |
| Idaho                | 8.5 (8.0-9.1)                                    | 28.7 (27.7-29.7) | 19.0 (18.4-19.6) | --               | 12.0 (10.1-13.9) |
| Illinois             | 7.8 (7.6-8.0)                                    | 21.4 (21.1-21.7) | 14.7 (14.5-14.9) | 19.1 (18.6-19.7) | 6.0 (5.7-6.4)    |
| Indiana              | 9.8 (9.5-10.0)                                   | 28.5 (28.0-29.0) | 19.4 (19.1-19.7) | 19.6 (18.6-20.6) | 7.1 (6.2-8.1)    |
| Iowa                 | 6.6 (6.3-7.0)                                    | 20.6 (20.0-21.2) | 13.7 (13.3-14.0) | 17.7 (15.1-20.4) | 8.0 (6.3-9.9)    |
| Kansas               | 6.0 (5.7-6.4)                                    | 17.3 (16.7-17.9) | 11.9 (11.5-12.2) | 13.8 (12.2-15.3) | 6.4 (5.3-7.4)    |
| Kentucky             | 16.6 (16.2-17.1)                                 | 44.4 (43.6-45.1) | 30.6 (30.2-31.1) | 29.2 (27.6-30.7) | 10.2 (8.3-12.5)  |
| Louisiana            | 14.0 (13.6-14.4)                                 | 34.8 (34.2-35.5) | 21.9 (21.5-22.3) | 30.8 (30.1-31.6) | 6.3 (5.2-7.4)    |
| Maine                | 4.9 (4.5-5.3)                                    | 16.5 (15.7-17.2) | 10.7 (10.2-11.1) | --               | --               |
| Maryland             | 6.3 (6.1-6.5)                                    | 15.4 (15.1-15.8) | 10.3 (10.1-10.6) | 12.6 (12.1-13.0) | 3.4 (2.9-4.0)    |
| Massachusetts        | 3.9 (3.8-4.1)                                    | 12.9 (12.6-13.2) | 8.4 (8.2-8.6)    | 8.8 (8.0-9.5)    | 5.8 (5.2-6.4)    |
| Michigan             | 6.6 (6.4-6.8)                                    | 17.8 (17.5-18.1) | 12.0 (11.8-12.2) | 13.6 (13.1-14.1) | 7.9 (7.0-8.8)    |
| Minnesota            | 2.7 (2.5-2.9)                                    | 10.6 (10.3-10.9) | 6.7 (6.5-6.9)    | 5.6 (4.8-6.5)    | 4.7 (3.7-5.9)    |
| Mississippi          | 18.9 (18.3-19.4)                                 | 48.7 (47.7-49.6) | 29.7 (29.1-30.4) | 41.1 (40.1-42.1) | 7.2 (5.2-9.6)    |
| Missouri             | 13.2 (12.9-13.5)                                 | 35.1 (34.6-35.7) | 24.4 (24.1-24.8) | 22.8 (21.9-23.8) | 10.4 (8.8-11.9)  |
| Montana              | 3.7 (3.3-4.1)                                    | 14.1 (13.2-14.9) | 9.0 (8.5-9.4)    | --               | --               |
| Nebraska             | 5.0 (4.6-5.4)                                    | 16.3 (15.6-17.0) | 10.9 (10.5-11.3) | 11.1 (9.0-13.1)  | 5.0 (3.8-6.5)    |
| Nevada               | 4.1 (3.8-4.4)                                    | 12.6 (12.1-13.1) | 9.5 (9.1-9.8)    | 9.1 (8.0-10.2)   | 4.0 (3.5-4.5)    |
| New Hampshire        | 3.4 (3.0-3.7)                                    | 11.8 (11.1-12.4) | 7.6 (7.3-8.0)    | 5.2 (4.1-12.6)   | --               |
| New Jersey           | 5.4 (5.2-5.6)                                    | 15.3 (15.0-15.6) | 10.1 (9.9-10.3)  | 15.2 (14.7-15.8) | 5.9 (5.5-6.2)    |

|                |                  |                  |                  |                  |                  |
|----------------|------------------|------------------|------------------|------------------|------------------|
| New Mexico     | 4.3 (3.9-4.6)    | 12.1 (11.5-12.7) | 8.2 (7.8-8.7)    | 8.7 (6.4-11.4)   | 7.9 (7.3-8.4)    |
| New York       | 5.2 (5.1-5.3)    | 14.7 (14.5-14.9) | 10.1 (10.0-10.3) | 11.4 (11.1-11.7) | 6.3 (6.1-6.6)    |
| North Carolina | 6.9 (6.7-7.1)    | 19.0 (18.7-19.4) | 12.6 (12.4-12.8) | 15.1 (14.7-15.6) | 3.7 (3.2-4.3)    |
| North Dakota   | 5.4 (4.7-6.0)    | 18.5 (17.3-19.7) | 12.2 (11.5-12.9) | 6.1 (5.8-22.3)   | --               |
| Ohio           | 8.0 (7.8-8.2)    | 22.7 (22.4-23.0) | 15.2 (15.0-15.4) | 15.9 (15.4-16.5) | 7.0 (6.1-8.0)    |
| Oklahoma       | 7.3 (7.0-7.6)    | 18.3 (17.8-18.8) | 12.9 (12.5-13.2) | 15.5 (14.3-16.8) | 6.3 (5.2-7.3)    |
| Oregon         | 3.8 (3.6-4.0)    | 11.7 (11.3-12.1) | 7.9 (7.7-8.2)    | 6.3 (4.8-8.0)    | 4.3 (3.6-5.1)    |
| Pennsylvania   | 7.4 (7.2-7.6)    | 21.6 (21.3-21.9) | 14.5 (14.3-14.7) | 14.6 (14.1-15.2) | 8.9 (8.1-9.6)    |
| Rhode Island   | 5.8 (5.3-6.3)    | 18.7 (17.8-19.6) | 12.4 (11.9-13.0) | 13.9 (11.3-16.5) | 6.4 (5.1-8.0)    |
| South Carolina | 10.5 (10.2-10.8) | 32.0 (31.4-32.6) | 19.8 (19.4-20.2) | 24.8 (24.1-25.6) | 7.2 (5.9-8.5)    |
| South Dakota   | 8.9 (8.1-9.6)    | 30.9 (29.5-32.3) | 20.1 (19.3-20.9) | 21.5 (13.3-32.8) | 13.4 (8.1-21.0)  |
| Tennessee      | 12.9 (12.6-13.3) | 35.1 (34.5-35.6) | 24.2 (23.8-24.5) | 23.6 (22.8-24.4) | 6.1 (5.0-7.3)    |
| Texas          | 9.2 (9.0-9.3)    | 23.2 (22.9-23.4) | 16.8 (16.6-17.0) | 20.2 (19.8-20.6) | 12.8 (12.6-13.0) |
| Utah           | 3.2 (2.9-3.5)    | 11.1 (10.5-11.6) | 7.3 (7.0-7.7)    | 8.9 (5.8-13.2)   | 4.9 (4.1-5.8)    |
| Vermont        | 3.1 (2.6-3.6)    | 10.9 (10.0-11.8) | 7.0 (6.5-7.5)    | --               | --               |
| Virginia       | 6.6 (6.4-6.8)    | 18.1 (17.7-18.4) | 12.0 (11.8-12.3) | 15.0 (14.5-15.5) | 3.7 (3.2-4.2)    |
| Washington     | 4.4 (4.3-4.6)    | 13.5 (13.2-13.8) | 9.0 (8.8-9.2)    | 10.8 (9.7-11.9)  | 6.7 (6.0-7.4)    |
| West Virginia  | 10.2 (9.6-10.7)  | 24.6 (23.8-25.4) | 17.4 (16.9-17.9) | 16.9 (14.3-19.6) | 5.5 (3.5-10.7)   |
| Wisconsin      | 6.0 (5.8-6.2)    | 21.5 (21.1-21.9) | 14.0 (13.8-14.3) | 12.8 (11.7-13.9) | 5.6 (4.7-6.6)    |
| Wyoming        | 8.7 (7.8-9.7)    | 26.1 (24.6-27.6) | 17.7 (16.8-18.6) | --               | 14.3 (11.1-18.1) |

CI: confidence interval; NH: Non-Hispanic

Rates were suppressed for data showing 0-9 deaths. Rates were not reported when estimates were unreliable for death counts less than 20.
